# Supplementary material
Source: publisher figshare collection journal article supplement (https://aacr.figshare.com/articles/dataset/_/23905271)

**Supplemental Figure 8. Co-occurrence of regions of gain(1q) and loss(1p).** **A.** The percentage of patients top and per patient (bottom) with specific region of gain **B.** A histogram summarising the number of gained regions per patient. **C.** The percentage of patients top and per patient (bottom) with specific regions of copy number loss **D.** Histogram summarizing the number of gained regions per patient.

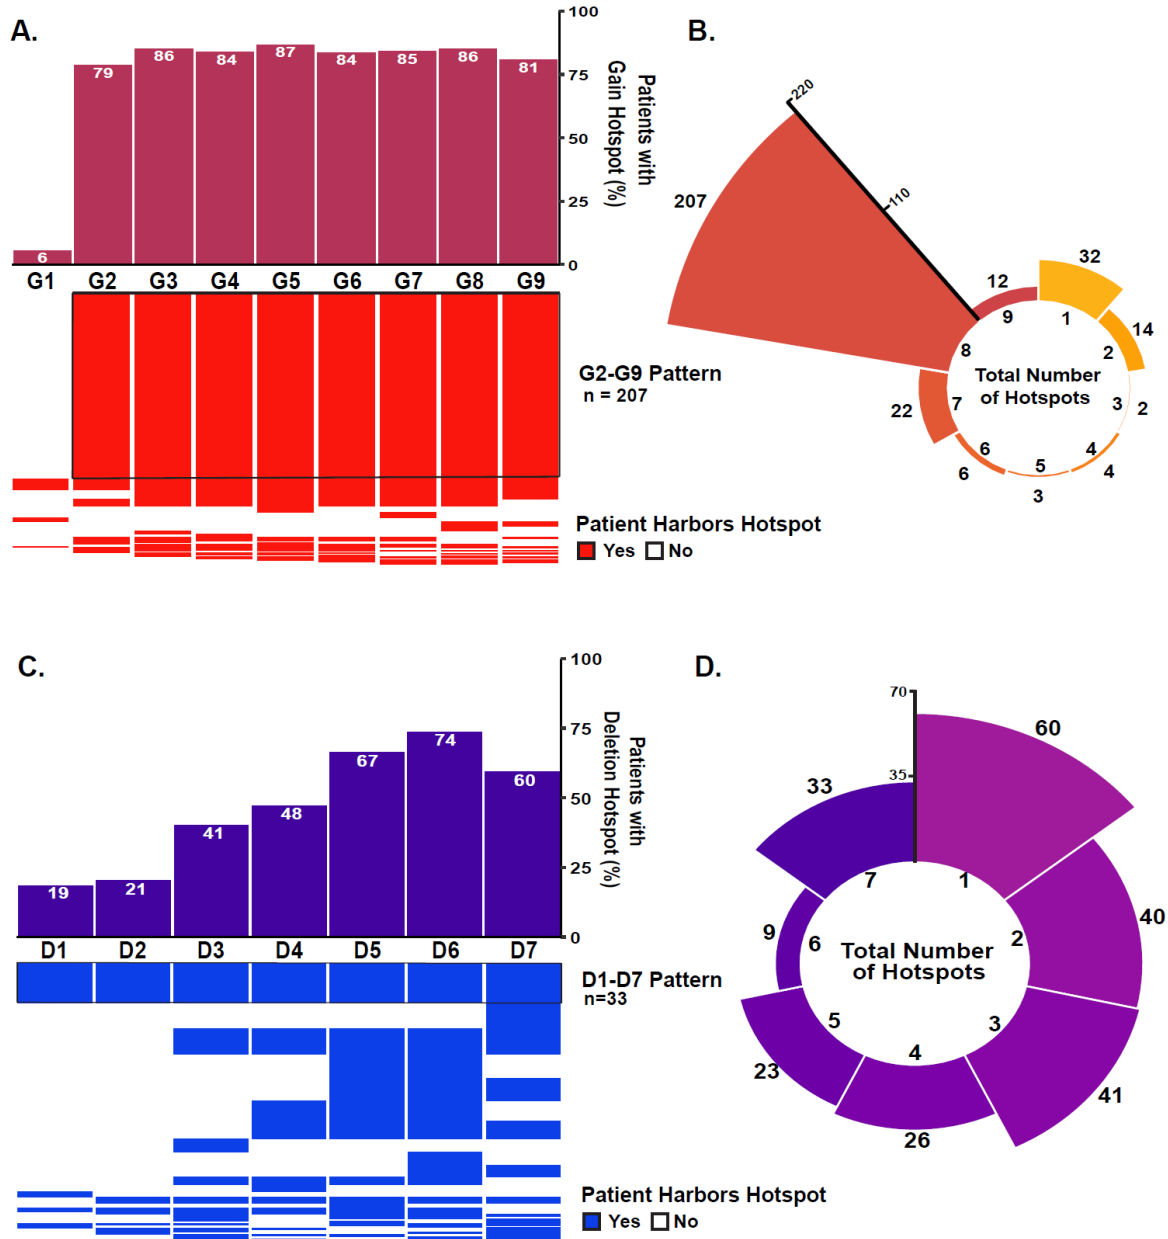

Supplement: Supplementary file 1 [file 41911454]
